# Supplementary material for: FASDD: An Open-access 100,000-level Flame and Smoke Detection Dataset for Deep Learning in Fire Detection
Source: Copernicus journal article supplement (doi:10.5194/essd-2023-73), 2023-03-15
Supplement: Supplementary file [file essd-2023-73-AC5-supplement.pdf]

## # RC1: 'Comment on essd-2023-73', Anonymous Referee #1, 17 Apr 2023

### Summary

Fire has wide impacts on Earth Systems and human society, and efficient fire detection could promote better understanding, modeling, and preventing fires. Wang et al., synthesized a comprehensive dataset (FASDD) covering images from terrestrial, airborne, and spaceborne sensors. For the previous version, I had nine major concerns about the data generation, data validation, and the usefulness of the data, but the current responses and version can hardly convince me for the majority of my major concerns. Here I reclaim my major concerns unaddressed and why they are critically important for fire detection using spaceborne satellite. I suggest the authors to handle those major concerns, otherwise, I really apologize and have to reject this work since these are critical or fundamental drawbacks for this study.

Response: Thank you for providing us with your insightful comments and feedback on our work. We greatly appreciate your expertise and the time you have dedicated to evaluating our paper. We have thoroughly revisited the concerns you raised in your previous review and have made significant improvements to address each of them. We understand the critical importance of data generation, data validation, and the usefulness of the dataset, particularly in the context of fire detection using satellite imagery. Our revisions aim to enhance the quality, reliability, and relevance of the dataset, aligning it more closely with the requirements of the study. We sincerely hope that the modifications we have made adequately address your concerns and demonstrate our commitment to providing a robust and valuable contribution to the field of fire detection. Once again, we express our gratitude for your feedback and assure you that we have taken your comments seriously in order to improve the overall quality of our work.

### Major comments

(1) Data generation: it's well known that near infrared (NIR) and short-wave infrared (SWIR) are two commonly used bands for fire detection while the authors only used the visible bands via visual interpretation. If only based on true colors, it can hardly convince me about the generality of the dataset for large spatial scale fire detection (e.g., some land surface items could show similar colors with fires in remote sensing images and thus mislead machine learning models). Also, the results in Table 3 showed the really low performance on detecting remote sensing fires even with advanced machine learning models. With such a lower accuracy, how can the data help improve fire detection.

My response to the authors' responses: I understand some previous works have used optical camera or RGB for smoke detection, but those purely RGB based fire detection works are used for terrestrial or near-surface fire monitoring instead of spaceborne satellite. The FASDD\_RS data include sentinel-2 and landsat8, and the NIR or SWIR bands are fundamentally important for monitoring fire-induced vegetation and dryness changes, and are basically used for fire detection. For example, the listed works below all used bands like NRI or SWIR. Some basic indexes with NIR and SWIR can achieve substantially higher accuracy (e.g., Castillo et al., 2020) than the reported accuracy by this study. Also the deep learning work in Pereira et al. 2021, achieved much higher accuracy than your work. I have never seen a published reliable fire dataset derived from satellite observations only used RGB.

- Barboza Castillo, E., Turpo Cayo, E. Y., de Almeida, C. M., Salas López, R., Rojas Briceño, N. B., Silva López, J. O., ... & Espinoza-Villar, R. (2020). Monitoring wildfires in the northeastern peruvian amazon using landsat-8 and sentinel-2 imagery in the GEE platform. *ISPRS International Journal of Geo-Information*, 9(10), 564.
- de Almeida Pereira, G. H., Fusioka, A. M., Nassu, B. T., & Minetto, R. (2021). Active fire detection in Landsat-8 imagery: A large-scale dataset and a deep-learning study. *ISPRS Journal of Photogrammetry and Remote Sensing*, 178, 171-186.
- Hu, X., Ban, Y., & Nascetti, A. (2021). Sentinel-2 MSI data for active fire detection in major fire-prone biomes: A multi-criteria approach. *International Journal of Applied Earth Observation and Geoinformation*, 101, 102347.

Response: Thank you very much for your comments and suggestions. We acknowledge the importance of near-infrared (NIR) and short-wave infrared (SWIR) bands in fire detection, as they are widely utilized in satellite-based fire monitoring. These bands play a crucial role in various applications, such as evaluating burnt areas post-fire using spectral indices (Barboza Castillo et al., 2020) or extracting fire segmentation masks employing deep learning techniques (De Almeida Pereira et al., 2021). In response to your concerns, we have made significant revisions to our dataset.

Firstly, we have incorporated the SWIR bands into the FASDD\_RS dataset by combining two SWIR (B12 and B11) bands and the Red (B4) band of Sentinel-2 imagery, following the methodology employed by Hu et al. (2021). This pseudo-color image dataset, FASDD\_RS (SWIR), is specifically designed for flame object detection.

Additionally, we have developed FASDD\_RS (RGB) to cater specifically to smoke object detection. This dataset utilizes the R, G, and B bands to enable accurate identification and analysis of smoke objects within the imagery.

Notably, we have retained all spectral bands, resulting in the creation of FASDD\_RS (All Bands) for simultaneous detection of flame and smoke objects. By introducing these three datasets, FASDD\_RS (All Bands), FASDD\_RS (SWIR), and FASDD\_RS (RGB), we aim to address the limitations of the initial RS dataset and provide more comprehensive options for flame and smoke detection.

We evaluated the performance of these revised datasets using the Swin Transformer (ST) model, and the results are presented in Table 3. The models trained on FASDD\_RS (SWIR) and FASDD\_RS (RGB) exhibited enhanced performance in flame and smoke

detection, respectively. For flame detection using FASDD\_RS (SWIR), the ST model achieved an mAP@0.5 score of 81.7% and a Recall score of 95.4% on the test set. Similarly, for smoke detection using the FASDD\_RS (RGB) dataset, the ST model achieved an mAP@0.5 score of 68.8% and a Recall score of 88.8% on the test set.

The evaluation results for FASDD\_RS (All Bands) demonstrated that the ST model performed well in detecting both flame and smoke objects, albeit with a decrease in accuracy compared to the smoke detection model trained on FASDD\_RS (RGB) and the flame detection model trained on FASDD\_RS (SWIR). This indicates that the inclusion of multispectral data facilitates simultaneous flame and smoke detection by leveraging information from a wider range of spectral bands. However, it is important to note that utilizing the additional bands incurs higher computational and memory requirements, and may introduce potential accuracy trade-offs due to potential interference from redundant bands. Notably, further improvements in model performance were obtained through the “pre-training + fine-tuning” approach, reaffirming the valuable contribution of large-scale heterogeneous data to the performance of fire detection models.

It should be noted that different deep learning tasks employ specific evaluation metrics to assess accuracy. Semantic segmentation tasks, as demonstrated in the work of De Almeida Pereira et al. (2021), often utilize metrics like F-Score, precision (P), and recall (R). In contrast, object detection tasks primarily rely on metrics such as mAP@0.5 and Recall. Object detection tasks involve predicting the position, size, and category of bounding boxes, presenting unique challenges distinct from classification and segmentation tasks. The provision of this benchmark dataset aims to facilitate research in the field of object detection and foster the development of advanced models for fire detection.

(2) Data generation: for active fire detection, middle infrared and thermal bands are also important but were ignored.

My response to the authors’ responses: Actually, landsat8 has thermal infrared bands. My concern is that why only use RGB for fire detection? The ultimate goal of this dataset is for improving fire detection instead of some technique details like only using one machine learning model with the same-format inputting dataset. If fusing different datasets can improve fire detection, why not use comprehensive models (e.g., different models) to fuse different datasets and finally achieve better fire detection (e.g., based on an ensemble of machine learning models)? If you use this dataset to develop one single model but throwing important bands information, I don’t think it is a good idea.

Response: Thank you for your valuable comments. We appreciate your point regarding the importance of including middle infrared and thermal bands for active fire detection. While Landsat 8 does offer thermal infrared bands, we made the decision to exclude them from the revised version of our dataset due to certain limitations. The atmospheric-corrected data of Landsat 8 presents challenges, as the smoke appears

similar to green vegetation, and there are anomalous black pixels around clouds. As a result, we opted to utilize Sentinel-2 L2A (Level 2A) products to generate the FASDD\_RS. Additionally, the spatial resolution of Landsat 8 is lower compared to Sentinel-2. Given the time constraints of this study, we plan to produce our own Level-2 Landsat 8 data in the future. This will allow us to expand our RS dataset and incorporate the necessary thermal infrared bands for enhanced fire detection.

We would like to highlight that the inclusion of RGB bands in our current dataset was a deliberate choice. We considered the potential application of the trained model to real-time fire detection using video satellites or CubeSats. For example, Azami et al. (2022) demonstrated the feasibility of active wildfire detection onboard the CubeSat using deep learning models. They trained these models for the wildfire image classification task using visible RS images captured by various satellite sensors. The availability of RGB bands in diverse satellite imagery sources makes them more readily accessible for practical implementation.

We greatly appreciate your suggestion regarding the utilization of different models and dataset fusion. Our primary objective in this study was to establish a benchmark dataset for the fire object detection task. As part of our evaluation, we selected the Swin Transformer as the baseline model in the revised manuscript, which has exhibited state-of-the-art performance on the CV benchmark dataset, specifically the COCO dataset. To gain a comprehensive understanding of the experimental settings, we kindly suggest referring to Section 4.1 of our revised paper, where you can find more detailed information. However, your idea of employing ensemble models and integrating multiple datasets is intriguing and worth exploring in future research endeavors. We will take your suggestion into consideration and explore the incorporation of different models and the fusion of diverse datasets to further enhance the accuracy of fire detection. Once again, we genuinely appreciate your insightful feedback.

(3) Data generation: for the fire detection, the authors used the top-of-atmosphere reflectance instead of atmospheric-corrected land surface reflectance which should be a problem. For example, if the smoke is white or grey, how to classify smoke versus clouds only through visual interpretation of true-colors? Meanwhile, the CV fire images should be obtained on land surface with a much higher spatial resolution (can be with sub-meter resolution in Fig. 4). Can such kinds of CV image trained machine learning models be directly used to large-scale remote sensing data without atmospheric-correction and with different spatial resolutions?

My response to the authors' responses: I understand that FASDD\_CV have images from UAVs. But from the results in Table 4, it seems that for FASDD\_RS, the model performance even dropped if we used FASDD (including FASDD\_RS and FASDD\_CV) for training the model. The dropped performance means that the knowledge derived from FASDD\_CV can hardly be transferred or used for improving FASDD\_RS. If so, why we should integrate those two heterogenous datasets?

Response: Thank you for your valuable insights. We appreciate your expertise in emphasizing the significance of atmospheric correction for accurate smoke detection. Based on your feedback, we have taken the necessary steps to address this concern by re-downloading Sentinel-2 Level-2A data. This ensures that the impact of clouds on smoke detection is minimized, leading to more reliable results.

Regarding the integration of FASDD\_CV and FASDD\_RS datasets, we understand your point regarding the observed drop in performance when using the original combined dataset for training. However, we would like to emphasize the potential benefits of knowledge transfer from CV to RS images. In order to demonstrate this, we conducted a "pretraining + fine-tuning" experiment. For the pretraining phase, we employed the Swin Transformer model, which was pretrained on the ImageNet-1K dataset. This pretrained model, referred to as ImgPT-ST, was then fine-tuned on the FASDD dataset, including both CV and RS images. The evaluation results of ImgPT-ST are presented in Table 4.

Notably, the ImgPT-ST model trained on FASDD outperformed all models trained solely on FASDD\_RS (RGB). It achieved a 2% gain in mAP@0.5 and a 1.2% gain in Recall for smoke objects, resulting in a mAP@0.5 of 74.0% and a Recall of 93%. The test results obtained from both the FASDD\_CV and FASDD\_RS (RGB) subsets indicate that the ImgPT-ST model effectively leverages the shared features learned from complex scenes containing flame and smoke. Consequently, it demonstrates advantages when faced with challenging sub-datasets.

(4) Data annotation: the "minimum bounding rectangle" was used to label the images. Commonly, fire detection is to classify whether each pixel is burned or not instead of a rectangle (e.g., the MODIS fire product in Giglio et al., (2018) and Giglio et al., (2016)). Meanwhile, the fire patch perimeter was always not rectangle (Laurent et al., 2018), therefore a bounding rectangle could contain both burned and unburned pixels, right?

My response to the authors' responses: Please clarify the differences for fire detection in terms of scene classification, object detection, and semantic segmentation; clarify the main focus of this dataset (e.g., objection detection tasks) and its differences with previous fire detection datasets from satellites in the main text. Currently, section 2.1 only mentioned about existing fire detection datasets for terrestrial and airborne but not including existing satellite fire detection datasets.

Response: Thank you for your valuable suggestion. We have taken it into consideration and made improvements to address the concerns raised. Scene classification, object detection, and semantic segmentation are fundamental deep learning tasks in the field of computer vision, each with distinct objectives and approaches. Regarding fire detection, scene classification determines whether an image scene contains fires, object detection identifies and localizes fire objects by drawing bounding boxes around them, and semantic segmentation achieves pixel-level understanding by assigning a fire label to each pixel (Kinaneva et al., 2019). In the revised manuscript, we have provided a

detailed clarification of the distinctions among different them. These differences are now clearly explained in Section 2.1 of the paper.

Furthermore, we have placed a stronger emphasis on the main focus of our dataset, which primarily revolves around object detection tasks. We have highlighted the differences between our dataset and previous satellite-based fire detection datasets in the *Introduction* section. In addition, we have included a discussion on existing satellite fire detection datasets in *Section 2.1*. We believe that these revisions have enhanced the clarity of our work and provided a more comprehensive understanding of the objectives and differentiating aspects of our dataset.

(5) Data validation: the true-color based visual interpretation could also involve biases, therefore it's important to validate the generated data against other reliable fire dataset, such as the MTBS data

My response to the authors' responses: it can hardly convince me by validating the dataset only using one specific fire event in MTBS. Additionally, for Figure 6, why not use metrics to quantitatively validate the dataset? Please comprehensively validate your dataset. If the dataset is not reliable, how can we trust it and use it?

Response: Thank you very much for your feedback. We greatly appreciate your concern regarding the validation of our dataset. In order to ensure its reliability, we conducted cross-dataset validations using established fire detection datasets. Specifically, we utilized the RGB bands of the Landsat 8 fire detection datasets created by De Almeida et al. (2021), as well as the MODIS dataset created by Ba et al. (2019). In our evaluation, we opted for the Swin Transformer (ST) and pretrained Swin Transformer (CVPT-ST) models. These models were trained using the FASDD\_RS (RGB) dataset, and we measured the accuracy of smoke detection on both datasets.

The detailed evaluation results can be found in Table 6 within the "Cross-dataset validations" section. These validation measures enhance the reliability and usability of our dataset for fire object detection research.

(6) Line 245-246, the dataset consists of 95,314 computer vision fire samples but only 5,773 remote sensing samples. Due to the data imbalance, the model performance (Table 2) on FASDD data therefore mainly depends on the model performance on FASDD\_CV. For the limited number of remote sensing fire samples, most samples in each region were distributed within ten days of a specific year (Table 1). Can such limited number of wildfires reflect all the seasonal and interannual changes of environmental conditions and fire dynamics so that machine learning models could learn from enough data? To my knowledge, the fire occurrence conditions changed across seasons and therefore the fire detectability could also be affected.

My response to the authors' responses: a) can CV dataset help improve fire detection

using RS (Table 4)? b) I disagree that “the features of fire objects do not have a high seasonal dependence” responded by the authors. The fire features including fire radiative power or fire intensity, fire spread, fire duration, and fire size, are strongly controlled by environmental conditions which could vary across seasons (e.g., dry season versus non-dry seasons) or within a season.

Response: Thank you for bringing up these important points. We greatly appreciate your input and concerns regarding the data imbalance and the limited number of remote sensing fire samples in our dataset. In response, we have redesigned our experiments as described in Section 4.

To address your questions:

a) Yes, the CV dataset has proven to be beneficial in improving fire detection using RS, as demonstrated by our experiments (as shown in Table 3). Pretraining the Swin Transformer model on the CV dataset and fine-tuning it on the RS dataset resulted in improved model performance. Specifically, when fine-tuning the pre-trained Swin Transformer model on FASDD\_CV, we achieved an increase in mAP@0.5 by 3.2% and Recall by 3% on the test set of FASDD\_RS (RGB). For FASDD\_RS (SWIR), the pretrained model using FASDD\_CV improved the mAP@0.5 by 0.5% on the test set, while maintaining a similar Recall. These results highlight the value of leveraging the knowledge gained from the CV dataset to enhance fire detection in RS imagery. Furthermore, our experiments demonstrated that training the model on the entire FASDD dataset, including both CV and RS images, led to higher accuracy on the FASDD\_RS (RGB) dataset compared to training from scratch directly on FASDD\_RS (RGB), as illustrated in Table 4.

b) We apologize for any confusion caused by our previous statement. We acknowledge that the features of fire objects, including fire radiative power, fire intensity, spread, duration, and size, are indeed strongly influenced by environmental conditions that can vary across seasons or within a season. We recognize the importance of considering these seasonal and interannual changes in fire dynamics and their impact on fire detectability. Our dataset aims to capture a diverse range of fire occurrences within a specific time frame, which includes different seasons, to provide insights into fire detection under varying conditions. To ensure good generalization and representation of environmental conditions and fire dynamics, we carefully curated remote sensing images from diverse fire-prone regions across different continents over a multi-year period spanning from January 1, 2019 to December 31, 2022. This selection process involved the utilization of a threshold selection method proposed by Hu et al. (2021). This effort allows for the incorporation of seasonal and yearly variations, enhancing the dataset's ability to reflect different environmental conditions.

We sincerely appreciate your valuable contributions and assistance in further improving our dataset. Your feedback has played a crucial role in enhancing the quality and applicability of our research.

(7) Evaluation in section 4: the evaluation mainly showed the extent to which machine

learning models could detect fires of generated FASDD data, therefore whether FASDD is reliable remains unknown. The FASDD data needed to be validated against other reliable fire products.

My response to the authors' responses: please see my comment in (5).

Response: Thank you for your valuable input. We appreciate your concern regarding the reliability of the FASDD dataset. To address this concern, FASDD was validated against two remote sensing fire detection datasets (Ba et al., 2019; De Almeida et al., 2021) obtained from different satellite sources (Landsat 8 and MODIS). This validation process was conducted rigorously and involved the use of consistent metrics to quantitatively assess the detection accuracy. The detailed results of these cross-dataset validations can be found in Table 6 within Section 6.

(8) There are many existing remote sensing fire products (e.g., MTBS, MODIS fire products) and CV fire data sets. I understand that combining the two kinds of dataset was the main difference of FASDD relative to other datasets, however, the authors did not show why combining these two kinds of dataset is important? Can combining these two kinds of datasets improve fire detection relative to existing fire detection algorithms (e.g., the method for MODIS or MTBS fire product)? If not, why people use such complex dataset (with different spatial resolution and without atmospheric-correction)

My response to the authors' responses: For table 4, the accuracy on FASDD\_RS is really lower than existing fire detection algorithms (see my major comment 1), and it seems that integrating those two datasets can achieve very limited benefit or even performance loss for three of total four machine learning methods. If so, why people use such complex dataset? Additionally, the MTBS is based on Landsat, not necessarily having a lower spatial resolution than your RS dataset.

Response: Thank you for your comment. We acknowledge the availability of existing remote sensing fire products and CV fire datasets. However, FASDD stands out by integrating cross-domain images from terrestrial, airborne, and spaceborne sensors, making it a comprehensive benchmark for deep learning object detection tasks. The combination of RS and CV data in FASDD offers several advantages. It allows for the utilization of complementary information, such as different spectral bands, spatial resolutions, and fire features, thereby enhancing the accuracy and robustness of fire detection models. Our experimental results, as shown in Table 3 and Table 4 of the revised manuscript, demonstrate the effectiveness of FASDD in improving fire detection performance compared to methods that rely solely on RS or CV data. Notably, FASDD contains three parts: FASDD\_CV, FASDD\_UAV, and FASDD\_RS, each of which can be accessed and utilized independently.

We have taken your feedback into account and made improvements to the dataset. Misclassified fire-like samples in FASDD\_RS (RGB) have been removed, and we have also introduced a dedicated FASDD\_RS (SWIR) dataset specifically designed for flame



detection using SWIR bands. The results from models trained on this dataset indicate improved fire detection performance. Additionally, our 'pretraining + fine-tuning' experiments highlight the value of pretrained models from large-scale CV datasets for learning remote sensing datasets. These experiments have consistently shown accuracy gains compared to training remote sensing datasets from scratch. Please refer to the revised manuscript for more details on the enhancements made to FASDD and the results of our performance evaluation experiments.

(9) Line 365-370: changing "epoch" is not ablation experiments. Ablation experiments commonly refer to changing a component of machine learning model (i.e., model structure changes)

Response: Thank you for pointing out the error in our description. We apologize for any confusion caused and have rectified the description accordingly.

## Reference

- Azami, M. H. B., Orger, N. C., Schulz, V. H., Oshiro, T., & Cho, M. (2022). Earth observation mission of a 6U CubeSat with a 5-meter resolution for wildfire image classification using convolution neural network approach. *Remote Sensing*, 14(8), 1874.
- Ba, R., Chen, C., Yuan, J., Song, W., & Lo, S. (2019). SmokeNet: Satellite smoke scene detection using convolutional neural network with spatial and channel-wise attention. *Remote Sensing*, 11(14), 1702.
- Barboza Castillo, E., Turpo Cayo, E. Y., de Almeida, C. M., Salas López, R., Rojas Briceño, N. B., Silva López, J. O., ... & Espinoza-Villar, R. (2020). Monitoring wildfires in the northeastern peruvian amazon using landsat-8 and sentinel-2 imagery in the GEE platform. *ISPRS International Journal of Geo-Information*, 9(10), 564.
- De Almeida Pereira, G. H., Fusioka, A. M., Nassu, B. T., & Minetto, R. (2021). Active fire detection in Landsat-8 imagery: A large-scale dataset and a deep-learning study. *ISPRS Journal of Photogrammetry and Remote Sensing*, 178, 171-186.
- Hu, X., Ban, Y., & Nascetti, A. (2021). Sentinel-2 MSI data for active fire detection in major fire-prone biomes: A multi-criteria approach. *International Journal of Applied Earth Observation and Geoinformation*, 101, 102347.
- Kinaneva, D., Hristov, G., Raychev, J., & Zahariiev, P. (2019, May). Early forest fire detection using drones and artificial intelligence. In *2019 42nd International Convention on Information and Communication Technology, Electronics and Microelectronics (MIPRO)* (pp. 1060-1065). IEEE.
